# Supplementary material for: Illness acceptance and community self-efficacy mediate the relationship between social isolation and loneliness among elderly people with Parkinson's Disease
Source: Research Square preprint supplement (doi:10.21203/rs.3.rs-5645836/v1), 2025-05-06
Supplement: Supplementary file 1 [file adee6be4018f670c24788a2f.xlsx]

## Sheet: Sheet1
序号	@1、性别	@2、年龄	@3、居住地	@4、受教育程度	@5、婚姻状况	@6、居住安排	@7、月收入	@8、健在子女数	@9、是否参与隔代抚育	@10、是否使用社交媒体如微信、微博、、抖音、快手等	@11、您认为您所在社区／村庄的资源情况交通条件、活动中心等	@12、是否参与社会活动公益活动、休闳娱乐	@13、帕金森病严重程度的HOEHNampYAHR分级	@14、您一个月至少与几个家人亲戚见面或联系？	@15、当您需要时，有几个家人亲戚可以给你提供帮助？	@16、您能和几个家人亲戚放心地谈你的私事？	@17、您一个月至少能与几个朋友见面或联系？	@18、当您有需要时，有几个朋友可以给您提供帮助？	@19、您能和几个朋友放心地谈您的私事？	客观社会隔离得分	@20、你常感到与周围人的关系和谐吗？	@21、你常感到缺少伙伴吗？	@22、你常感到没人可以信赖吗？	@23、你常感到寂寞吗？	@24、你常感到属于朋友们的一员吗？	@25、你常感到与周围的人有许多共同点吗？	@26、你常感到与任何人都不亲密了吗？	@27、你常感到你的兴趣与想法与周围的人不一样吗？	@28、你常感到想要与人来往、结交朋友吗？	@29、你常感到与人亲近吗？	@30、你常感到被人冷落吗？	@31、你常感到与别人来往毫无意义吗？	@32、你常感到没有人很了解你吗？	@33、你常感到与别人隔开了吗？	@34、你常感到当你愿意时就能找到伙伴吗？	@35、你常感到有人真正了解你吗？	@36、你常感到胆怯吗？	@37、你常感到有人围着你但并不关心你吗？	@38、你常感到有人愿意与你交谈吗？	@39、你常感到有人值得你信赖吗？	孤独得分	@40、行走	@41、使用公共车辆	@42、做饭菜	@43、做家务	@44、吃药	@45、吃饭	@46、穿衣	@47、洗衣
16	2	63	1	1	2	4	1	4	1	2	1	1	2	2	3	3	3	2	2	15	1	3	2	1	2	3	1	1	3	3	2	3	2	2	2	1	2	3	3	1	41	2	2	3	3	3	4	2	3
110	2	73	1	1	1	1	1	3	1	2	1	2	1	2	2	1	3	3	3	14	2	2	2	2	2	2	1	2	3	2	3	2	2	2	1	2	3	2	2	2	41	1	1	1	1	1	1	1	1
120	2	75	2	1	1	3	1	2	1	2	1	2	2	3	3	2	0	0	0	8	2	2	3	3	3	3	3	3	4	3	3	3	3	4	3	3	3	2	3	2	58	1	2	4	3	1	1	1	2
78	1	70	2	1	2	1	1	3	2	2	1	2	6	0	2	0	0	2	2	6	3	2	3	3	3	3	2	2	3	3	3	3	3	3	2	3	3	3	3	3	56	2	2	2	2	2	2	2	2
136	2	79	1	1	2	4	1	3	1	1	1	2	4	0	0	2	0	4	5	11	3	4	2	4	1	2	2	3	2	3	4	2	2	2	2	2	2	1	2	4	49	3	4	1	3	1	3	3	1
6	2	61	1	1	2	3	1	7	1	2	2	2	7	5	4	3	3	2	0	17	1	4	2	3	2	2	1	1	3	2	2	2	1	3	3	2	3	1	2	2	42	3	4	3	3	1	3	3	4
30	1	65	1	1	1	4	1	3	2	2	2	2	2	1	1	0	1	1	0	4	2	3	3	3	2	2	3	3	2	2	3	3	3	3	2	2	3	3	2	2	51	1	1	1	1	1	1	1	2
32	2	65	1	1	2	4	1	3	1	1	2	1	2	3	3	2	1	1	1	11	2	3	2	2	3	2	2	2	3	3	2	3	3	2	3	3	2	2	2	3	49	2	2	2	2	2	2	2	2
47	2	67	1	1	2	1	1	2	2	2	2	2	2	2	2	2	3	3	2	14	3	1	2	1	4	4	1	1	4	4	2	1	2	1	4	3	2	1	3	3	47	2	2	1	2	1	1	1	2
57	1	68	1	1	2	2	1	2	2	2	2	1	3	2	3	1	1	2	0	9	2	3	3	3	2	2	3	3	2	2	3	3	3	3	2	2	3	3	2	2	51	1	1	2	2	1	1	1	2
74	1	69	1	1	2	4	1	10	2	2	2	2	2	3	4	1	4	3	2	17	2	3	3	3	1	1	3	3	3	2	3	3	3	3	3	4	4	4	3	3	57	1	1	1	1	1	1	1	1
77	2	70	2	1	2	4	1	3	2	2	2	2	3	2	3	2	2	2	2	13	2	2	3	2	2	2	4	3	1	2	2	2	2	2	2	2	3	4	3	3	48	1	2	1	2	1	1	1	2
91	1	70	1	1	2	4	1	6	2	2	2	2	2	5	5	5	5	4	4	28	4	2	1	1	1	2	1	1	2	1	1	1	1	1	1	1	1	1	1	1	26	3	3	2	3	1	1	3	3
103	2	71	1	1	1	3	1	8	2	2	2	2	2	2	3	1	4	2	1	13	2	3	3	3	2	2	3	3	2	2	3	3	3	3	2	2	3	3	2	2	51	3	1	1	1	1	1	1	1
125	1	75	1	1	2	4	1	6	2	2	2	2	7	4	2	1	3	1	0	11	3	4	3	4	4	1	1	1	3	3	2	1	4	3	3	3	4	4	3	3	57	2	4	4	3	3	3	3	4
126	2	75	1	1	2	3	1	7	1	2	2	2	2	4	4	3	3	3	2	19	3	2	2	2	3	3	2	2	3	1	2	2	2	2	2	2	2	2	2	2	43	3	3	2	2	1	1	2	2
13	2	63	1	1	2	2	1	3	2	2	2	2	2	3	3	3	2	2	2	15	1	2	2	2	2	2	2	2	3	1	2	2	2	2	3	3	2	2	2	2	41	1	1	1	1	1	1	1	1
17	2	63	2	1	1	3	1	4	2	1	2	1	3	3	3	3	4	3	2	18	1	3	2	2	1	2	2	3	2	2	3	2	2	3	3	3	3	2	2	2	45	1	1	1	1	1	1	1	1
63	1	68	1	1	2	2	1	4	1	1	2	1	2	4	4	4	2	5	4	23	1	1	1	3	1	1	1	1	3	2	2	3	3	2	3	2	3	3	3	3	42	1	1	2	2	1	1	1	1
59	2	68	1	1	1	4	1	3	2	2	2	2	3	1	1	1	1	3	3	10	2	2	2	3	1	1	4	2	3	2	4	2	2	2	3	3	3	3	3	2	49	3	3	3	3	3	2	2	2
102	2	71	1	1	2	4	1	7	1	2	2	2	2	3	5	3	2	2	2	17	2	1	1	3	2	2	2	2	3	2	1	1	1	1	2	2	1	1	2	2	34	2	2	2	2	2	1	1	3
73	2	69	1	1	2	2	1	6	1	2	2	2	8	3	3	2	0	0	0	8	2	3	2	3	3	3	3	3	3	2	3	3	3	3	2	2	3	2	3	2	53	4	4	4	4	3	3	3	4
25	2	65	1	2	1	1	1	1	2	1	2	1	1	1	2	0	1	1	1	6	2	4	4	4	2	2	3	3	1	2	3	3	3	3	3	2	4	3	2	2	55	1	1	1	1	1	1	1	1
38	2	65	2	1	2	2	1	4	2	2	1	2	4	2	1	0	0	0	0	3	3	2	3	3	3	3	3	3	3	3	2	3	3	3	3	3	2	3	3	2	56	2	2	3	3	2	2	2	3
62	2	68	2	1	2	3	1	3	1	2	1	2	3	2	2	2	1	0	0	7	2	3	2	3	3	3	3	2	2	2	3	2	2	3	3	3	1	2	3	3	50	1	2	2	2	1	1	2	2
72	1	69	2	1	2	3	1	5	1	2	1	2	3	3	2	2	0	0	0	7	3	2	3	1	2	4	2	3	2	3	2	2	3	3	2	3	1	2	3	3	49	2	2	2	2	1	2	1	2
97	2	71	2	1	2	4	1	3	1	2	1	2	3	3	2	2	0	0	0	7	3	3	1	3	4	3	3	3	3	3	2	3	3	3	3	3	2	3	3	2	56	2	2	2	2	1	2	1	2
101	2	71	1	1	2	4	1	5	2	2	1	1	2	4	3	3	4	3	3	20	2	3	3	3	2	2	3	3	2	2	3	3	3	3	2	2	3	3	2	2	51	1	2	2	2	1	1	1	2
107	2	72	2	1	2	2	1	4	1	2	1	2	3	1	2	0	0	0	0	3	3	3	3	3	3	3	3	2	2	3	3	3	3	3	3	3	1	3	3	3	56	1	2	3	3	1	1	2	3
134	2	78	2	1	2	3	1	4	1	2	1	2	4	3	2	2	0	0	0	7	3	3	2	3	4	3	3	3	3	3	2	3	3	3	3	3	1	3	3	2	56	1	2	2	2	1	2	1	2
49	2	67	2	1	2	2	1	3	1	2	1	1	2	3	2	2	3	3	2	15	1	1	1	3	2	1	1	2	1	1	2	1	2	2	3	3	1	1	2	2	33	1	1	1	1	1	1	1	1
51	1	67	2	1	2	2	1	3	1	2	1	2	2	1	1	0	1	0	0	3	2	3	2	3	3	3	2	2	2	3	3	2	3	3	3	3	1	3	2	3	51	1	2	2	2	1	1	2	2
33	2	65	2	2	2	4	1	4	1	1	1	2	4	5	5	0	5	5	0	20	2	1	4	1	1	3	3	2	3	2	1	1	1	1	1	2	1	1	1	1	33	1	1	1	1	1	1	1	1
12	1	63	2	2	2	4	1	2	2	2	1	2	2	4	2	1	1	0	0	8	1	4	4	3	4	2	3	3	3	2	3	3	3	3	2	3	3	3	2	2	56	1	3	3	3	3	3	3	3
131	1	77	1	2	2	1	1	8	1	2	1	1	7	0	5	5	1	1	1	13	1	1	1	1	3	2	1	2	1	4	4	1	4	4	4	2	2	2	4	2	46	4	4	3	2	2	4	2	1
5	1	61	1	1	2	4	1	4	1	2	2	2	5	4	2	4	3	0	0	13	3	3	3	3	3	2	3	3	1	1	3	1	3	3	3	4	3	3	2	2	52	2	2	3	2	1	1	1	3
18	2	63	1	1	1	3	1	4	1	1	2	1	2	4	2	1	5	3	3	18	4	1	3	3	1	1	2	3	1	1	1	1	3	3	1	1	1	3	1	1	36	1	1	1	1	1	1	1	1
20	2	63	1	1	2	2	1	5	2	2	2	2	7	3	4	1	4	3	0	15	3	3	3	3	3	3	4	4	2	3	3	3	4	3	4	3	4	3	2	3	63	3	4	4	4	3	3	3	4
24	2	64	1	1	2	4	1	10	1	1	2	2	2	4	4	3	4	3	3	21	1	3	2	2	4	1	2	4	1	1	2	2	2	2	1	2	3	4	1	1	41	1	1	1	1	1	1	1	1
31	1	65	1	1	2	2	1	3	1	2	2	2	3	1	1	1	1	1	1	6	2	2	2	2	2	3	2	1	3	3	2	2	2	2	3	3	2	2	3	2	45	1	1	1	1	1	1	1	1
50	2	67	1	1	2	4	1	3	1	1	2	2	3	3	4	3	3	3	2	18	1	1	1	2	1	2	1	2	1	1	1	1	2	2	2	1	2	2	2	2	30	1	3	2	2	1	1	1	1
67	2	68	1	1	2	4	1	6	1	2	2	1	5	3	3	1	4	1	0	12	2	2	3	3	2	2	2	2	2	2	2	2	3	3	3	2	3	2	1	2	45	1	3	1	1	2	1	3	3
82	1	70	1	1	2	2	1	3	1	1	2	1	6	2	3	3	2	2	2	14	1	2	2	2	2	1	1	3	2	1	1	2	4	2	2	2	2	2	2	1	37	2	3	1	2	2	1	1	2
85	1	70	1	1	2	4	1	4	2	2	2	2	5	4	3	2	4	3	2	18	2	2	1	2	1	2	1	2	1	1	4	1	1	1	1	2	2	1	1	1	30	1	3	3	2	1	1	2	2
90	2	70	2	1	2	2	1	5	1	2	2	2	4	1	1	0	0	0	0	2	3	3	4	3	3	3	3	2	3	3	3	3	3	3	3	3	3	3	3	2	59	1	2	2	3	1	2	2	3
95	2	71	2	1	2	4	1	3	1	2	2	2	3	2	3	3	1	0	0	9	2	2	2	2	3	2	2	3	2	2	2	1	2	3	3	3	1	3	2	2	44	1	1	1	2	2	1	1	1
96	2	71	1	1	2	4	1	3	1	2	2	1	4	5	4	3	5	4	2	23	1	1	1	1	1	1	1	1	4	1	1	1	1	1	2	1	1	1	1	1	24	1	1	1	1	1	1	1	1
141	1	89	2	1	2	4	1	4	1	1	2	2	3	3	5	3	0	0	0	11	1	1	1	1	4	1	1	1	2	1	1	1	1	1	4	4	1	1	1	1	30	1	2	1	1	1	1	1	1
9	1	62	1	1	2	3	1	3	2	2	2	1	2	1	1	1	3	3	1	10	2	3	3	3	2	2	3	3	2	2	3	3	3	3	2	2	3	3	2	2	51	3	3	3	3	4	4	4	4
10	2	62	2	1	2	2	1	4	1	1	2	2	3	3	3	2	2	1	0	11	2	3	3	3	2	2	3	3	2	2	3	2	3	2	3	3	3	3	2	2	51	1	1	2	2	1	1	1	1
15	1	63	2	1	2	4	1	3	2	2	2	2	4	3	2	2	0	0	0	7	3	3	1	3	4	3	3	3	3	3	2	3	3	3	3	3	2	3	3	2	56	2	2	2	2	1	2	1	2
21	1	64	2	1	2	4	1	3	2	2	2	1	6	3	4	0	3	2	0	12	1	1	1	1	1	2	2	2	1	1	1	1	3	1	1	1	1	2	1	1	26	3	3	2	2	1	1	1	3
27	2	65	1	1	1	1	1	2	2	2	2	2	2	1	1	1	1	2	1	7	2	3	3	3	3	3	3	3	2	2	3	2	3	2	2	4	2	3	2	2	52	1	1	1	1	1	1	1	1
46	2	66	1	1	2	2	1	4	1	2	2	1	2	2	3	2	3	1	1	12	2	3	3	2	1	2	2	4	2	3	1	3	2	1	3	2	1	3	2	4	46	3	3	1	1	1	1	1	1
58	2	68	2	1	2	2	1	3	1	1	2	1	2	3	3	2	2	3	2	15	2	3	2	3	2	2	3	3	2	2	2	3	2	2	3	3	2	2	2	2	47	2	2	2	2	1	1	2	3
64	2	68	2	1	2	4	1	4	1	1	2	1	2	3	4	3	3	3	3	19	2	2	2	2	2	2	2	2	2	2	2	2	2	2	2	2	2	2	2	2	40	1	1	1	1	1	1	1	1
87	1	70	2	1	2	3	1	4	1	2	2	1	4	2	3	2	3	2	2	14	1	2	2	2	1	1	2	2	1	1	2	1	2	2	2	2	2	2	1	1	32	4	1	2	2	1	1	1	3
93	1	71	1	1	2	2	1	2	2	2	2	1	2	2	2	2	3	3	2	14	1	2	3	3	1	1	2	2	3	1	2	2	2	2	1	1	3	2	1	1	36	2	1	1	2	1	1	1	2
99	1	71	1	1	2	4	1	4	1	1	2	1	3	4	4	3	3	3	3	20	1	3	2	2	1	2	2	2	2	2	2	1	2	3	2	2	2	2	2	2	39	2	2	2	2	1	1	1	2
113	2	74	2	1	1	5	1	1	2	2	2	2	8	0	1	0	0	0	0	1	4	2	4	4	4	4	3	3	4	4	3	3	4	4	4	4	3	2	2	4	69	4	4	4	4	3	4	4	4
2	1	60	1	2	1	1	1	2	2	2	2	1	2	3	2	1	3	2	2	13	1	3	3	3	1	2	3	3	2	2	3	2	2	1	3	2	4	3	3	3	49	2	1	2	1	1	1	2	2
40	1	65	1	2	1	3	1	6	2	1	2	2	4	5	5	1	5	5	2	23	1	1	3	1	1	1	1	1	1	1	3	1	3	1	1	2	1	2	1	1	28	1	1	1	1	1	1	1	1
44	1	66	2	2	2	4	1	3	1	1	2	1	4	3	4	3	3	3	3	19	1	2	2	2	1	2	2	2	2	2	2	2	2	2	2	2	2	2	2	1	37	1	1	1	1	1	1	1	1
71	2	69	2	2	2	3	1	3	1	1	2	1	4	3	2	3	1	2	3	14	3	2	3	2	3	4	3	2	3	2	3	2	2	2	2	3	2	3	3	2	51	2	3	3	3	3	2	2	3
80	2	70	2	2	2	1	1	3	2	1	2	2	1	2	2	3	3	1	2	13	1	2	4	3	4	2	1	3	4	2	3	3	3	2	1	1	3	3	2	2	49	2	1	3	3	3	2	4	4
89	1	70	2	2	2	2	1	5	2	1	2	1	5	2	1	3	2	2	2	12	2	3	2	3	3	2	2	2	3	3	3	2	2	3	2	3	3	4	3	2	52	2	3	3	2	3	2	3	2
48	2	67	1	2	1	1	1	2	1	1	2	1	8	2	3	2	2	3	2	14	1	2	2	3	1	1	2	3	4	2	1	3	3	3	2	3	3	3	1	1	44	1	1	1	1	1	1	1	1
81	1	70	1	2	2	2	1	3	1	1	2	1	3	2	3	2	2	3	3	15	2	2	1	3	2	3	2	2	3	3	3	3	2	3	3	2	3	2	3	3	50	2	3	2	2	2	2	2	2
75	1	70	1	1	1	2	1	2	1	2	2	2	6	2	3	3	1	1	2	12	1	2	3	2	3	2	2	2	3	2	2	3	2	3	2	3	2	3	1	3	46	3	3	3	3	4	4	3	4
108	1	72	1	1	2	2	1	4	1	2	2	2	6	3	3	4	3	2	2	17	3	3	2	3	2	2	2	3	2	2	2	1	2	2	2	2	2	2	3	3	45	2	3	3	3	2	2	2	2
37	2	65	2	1	1	1	2	4	1	2	1	1	4	2	1	3	1	3	0	10	3	4	3	3	4	2	2	4	3	2	2	4	2	4	3	1	2	3	4	1	56	3	2	3	1	3	2	2	1
55	1	67	2	1	2	4	2	4	1	1	1	2	2	3	3	3	2	0	0	11	2	2	2	1	1	3	2	2	2	2	2	1	2	1	2	2	1	3	2	2	37	1	1	2	2	1	1	1	2
118	1	74	2	1	2	4	2	3	1	2	1	2	2	2	2	2	1	1	0	8	2	2	2	2	3	2	2	2	2	2	2	2	2	2	3	2	1	2	2	2	41	1	1	2	2	1	1	1	2
121	1	75	2	1	1	1	2	3	1	1	1	1	2	3	1	2	2	2	2	12	1	2	3	3	2	2	3	2	2	2	1	1	2	1	1	1	1	1	2	2	35	1	1	1	2	1	1	1	1
23	1	64	2	1	2	3	2	4	1	2	1	2	2	3	3	3	2	0	0	11	2	2	2	3	4	2	2	2	2	2	2	1	2	2	2	2	1	1	2	1	39	1	1	2	2	1	1	1	2
29	1	65	2	1	2	2	2	2	2	2	1	2	3	1	1	0	0	0	0	2	3	3	3	3	3	3	3	2	3	3	3	3	3	3	3	3	3	3	3	2	58	1	2	2	3	1	2	2	3
36	1	65	2	1	2	2	2	4	2	1	1	1	5	1	3	3	3	2	3	15	2	3	1	3	1	2	1	3	1	2	2	1	2	3	2	2	3	2	1	2	39	1	1	2	2	2	3	2	3
56	1	68	2	1	2	2	2	2	1	1	1	1	4	2	3	1	4	3	1	14	1	2	1	2	1	2	1	2	2	2	2	1	1	1	1	1	2	1	1	1	28	1	1	1	1	1	1	1	2
92	1	71	2	1	2	4	2	2	2	1	1	2	1	2	2	2	1	2	2	11	2	3	2	2	2	2	1	2	2	3	2	1	2	1	3	3	2	2	4	2	43	1	2	1	1	2	1	1	2
111	1	73	1	1	2	4	2	3	1	2	1	1	2	4	3	0	5	4	0	16	1	2	2	3	2	2	1	2	2	2	2	2	2	2	2	1	1	3	2	2	38	1	1	1	1	1	1	1	1
130	1	77	1	1	2	2	2	4	2	1	1	1	5	2	1	1	3	2	2	11	2	2	3	2	3	2	1	1	2	3	3	1	3	4	3	2	2	3	3	1	46	1	2	3	3	4	2	4	2
11	1	63	2	2	2	2	2	1	2	1	1	2	2	4	3	3	5	2	2	19	1	1	1	1	1	1	1	2	2	1	1	1	1	1	1	1	1	1	1	1	22	1	1	1	1	1	1	1	1
14	1	63	2	2	2	2	2	3	2	1	1	1	2	2	3	3	2	3	2	15	1	1	1	2	2	1	1	2	2	1	1	2	1	2	2	1	1	2	2	1	29	1	2	2	2	1	1	1	2
94	1	71	2	2	2	4	2	3	1	2	1	1	2	3	3	3	4	3	3	19	2	2	3	3	2	2	2	3	2	2	2	2	2	3	2	2	2	2	2	2	44	2	2	3	3	1	1	1	3
109	1	72	2	2	2	4	2	5	1	1	1	1	3	3	3	2	3	3	1	15	1	3	2	1	1	1	1	2	1	1	1	1	1	1	2	1	2	1	2	1	27	2	2	2	2	1	1	1	2
115	1	74	1	2	2	3	2	2	2	2	1	2	3	1	1	3	3	2	2	12	2	2	3	3	3	3	3	2	3	2	3	2	2	2	1	2	2	3	2	3	48	2	3	2	3	3	3	2	3
116	2	74	2	2	2	2	2	3	1	1	1	2	2	2	2	2	2	0	0	8	2	2	2	3	2	2	2	3	1	1	2	1	1	1	1	2	1	2	1	2	34	1	2	4	4	1	1	3	4
34	1	65	2	2	2	4	2	4	1	1	1	1	2	3	3	3	3	2	2	16	1	1	1	1	1	2	2	2	1	1	2	1	2	3	1	2	2	2	1	1	30	1	1	2	1	1	1	1	1
138	1	80	2	2	2	2	2	3	1	2	1	2	2	3	3	3	4	3	3	19	2	3	2	2	2	2	2	2	3	3	1	2	2	2	2	2	2	2	2	2	42	1	1	2	2	1	1	1	1
3	1	60	2	2	2	2	2	3	1	1	1	1	1	3	3	3	3	3	3	18	1	2	2	2	2	2	2	2	2	2	2	2	2	2	2	2	2	2	2	2	39	1	1	1	1	1	1	1	1
28	1	65	2	1	2	2	2	2	1	2	2	2	3	1	1	0	0	0	0	2	3	3	4	3	3	3	3	2	3	3	3	3	3	3	3	3	3	3	3	2	59	1	2	2	3	1	2	2	3
61	2	68	2	1	2	2	2	3	1	2	2	2	3	1	2	1	0	0	0	4	2	2	3	3	3	3	3	3	3	3	3	2	3	3	3	2	2	3	3	2	54	1	1	2	2	1	1	1	3
76	2	70	2	1	2	2	2	2	1	1	2	2	3	2	2	1	4	1	1	11	1	1	3	3	3	3	2	2	2	3	4	1	3	2	2	3	3	2	2	1	46	2	1	3	3	2	2	2	4
84	1	70	1	1	2	3	2	4	2	2	2	2	6	3	2	1	5	4	3	18	4	2	2	3	2	2	2	2	2	2	2	2	2	2	3	2	3	3	2	2	46	2	4	3	3	2	2	3	3
88	1	70	1	1	2	4	2	4	2	1	2	1	3	2	4	1	2	3	2	14	2	2	2	3	1	2	2	3	1	2	2	2	3	2	1	1	3	4	1	2	41	1	3	2	3	1	1	2	3
117	1	74	2	1	1	3	2	3	1	2	2	1	2	4	2	2	3	2	2	15	1	3	3	3	1	2	3	3	1	2	3	2	2	2	2	2	2	1	2	1	41	1	1	2	1	1	1	1	1
119	1	74	2	1	2	2	2	4	1	2	2	2	4	1	1	0	0	0	0	2	3	3	4	3	3	3	3	2	3	3	3	3	3	3	3	3	3	3	3	2	59	1	2	2	3	1	2	2	3
127	1	76	2	1	2	2	2	2	2	2	2	2	2	1	1	0	0	0	0	2	3	3	4	3	3	3	3	2	3	3	3	3	3	3	3	3	3	3	3	2	59	1	2	2	3	1	2	2	3
132	2	78	2	1	2	2	2	3	1	2	2	2	2	1	1	0	0	0	0	2	3	3	4	3	3	3	3	2	3	3	3	3	3	3	3	3	3	3	3	2	59	1	2	2	3	2	2	2	3
1	2	60	1	1	2	2	2	2	2	1	2	2	3	1	2	2	3	2	0	10	2	3	3	3	3	2	2	2	2	2	3	2	3	3	4	3	4	2	3	2	53	2	3	2	2	2	2	2	2
39	1	65	1	1	2	4	2	4	2	2	2	2	3	1	2	2	0	0	2	7	2	3	3	3	3	3	3	2	3	2	2	3	4	3	2	3	3	3	3	2	55	3	3	2	2	2	3	3	2
43	1	66	1	1	2	2	2	3	2	1	2	2	5	2	2	2	4	2	1	13	2	4	3	2	4	1	3	2	1	2	4	3	3	1	4	3	3	2	2	2	51	1	3	4	2	3	2	2	2
68	1	69	2	1	2	2	2	2	1	2	2	1	2	3	3	1	3	4	3	17	1	2	2	1	1	1	2	2	1	1	1	2	1	1	1	1	1	1	1	1	25	1	1	1	1	1	1	1	1
105	2	72	2	1	1	4	2	3	1	2	2	2	4	3	2	2	2	2	2	13	3	2	4	3	3	4	2	3	2	2	2	2	3	2	3	2	2	2	2	2	50	2	2	3	3	2	2	3	3
135	2	78	2	1	1	1	2	4	2	1	2	1	4	0	5	4	4	5	4	22	1	1	2	2	4	3	1	4	4	1	2	4	2	4	4	2	3	1	3	2	50	3	2	3	1	3	2	3	1
7	2	62	1	2	1	3	2	2	1	2	2	2	1	2	0	2	2	1	0	7	4	2	3	2	2	1	2	3	3	3	2	3	1	2	4	4	3	2	1	4	51	1	1	3	2	2	1	3	3
26	1	65	2	2	2	4	2	2	2	2	2	2	2	4	4	2	4	4	3	21	1	1	1	1	1	1	1	3	2	2	1	1	1	1	2	2	1	1	2	2	28	1	1	1	1	1	1	1	1
69	1	69	2	2	2	2	2	2	2	1	2	1	4	3	3	3	4	3	3	19	1	4	2	2	2	1	2	2	2	2	2	1	2	3	2	2	2	3	1	1	39	1	1	1	1	1	1	1	1
114	1	74	2	2	2	2	2	2	1	2	2	1	2	3	2	2	3	3	2	15	2	2	2	2	1	2	2	3	2	2	2	2	2	2	2	2	2	3	3	3	43	1	1	2	2	1	1	2	3
123	2	75	2	2	2	2	2	4	2	1	2	2	1	4	3	4	3	5	2	21	2	3	3	2	3	2	3	3	2	2	4	3	2	1	3	3	1	1	3	2	48	2	4	3	2	4	4	1	3
133	2	78	2	2	2	3	2	3	1	2	2	2	4	2	2	2	0	0	0	6	3	3	1	3	4	3	3	3	3	3	2	3	3	3	3	3	2	3	3	2	56	2	2	2	1	2	1	2	2
142	1	89	2	2	2	4	2	5	1	2	2	2	3	4	4	3	2	2	2	17	1	2	2	3	1	2	2	2	1	1	2	2	2	2	3	2	2	2	1	1	36	3	4	4	4	3	2	2	4
42	2	66	2	2	2	2	2	1	2	1	2	1	2	4	3	3	3	3	3	19	1	1	1	1	1	1	1	1	2	2	3	3	3	3	2	2	3	3	2	2	38	1	1	3	3	1	1	1	3
60	1	68	2	2	2	2	2	3	2	1	2	1	2	4	3	3	4	2	2	18	1	2	2	2	1	2	2	3	2	2	2	2	2	2	2	2	2	2	3	1	39	1	1	2	2	1	1	1	2
122	1	75	2	2	2	3	2	3	2	1	2	1	3	3	5	0	4	4	1	17	2	3	2	1	1	2	1	2	1	1	1	3	2	1	2	1	3	2	2	2	35	1	3	2	1	1	1	1	2
54	1	67	2	1	2	2	2	4	1	2	1	2	2	3	3	2	2	1	1	12	2	3	3	3	2	2	2	2	3	2	2	2	3	3	2	2	2	3	2	2	47	1	2	2	2	1	1	2	2
65	1	68	2	1	2	4	2	4	1	2	1	2	2	3	3	1	2	0	0	9	2	2	2	2	3	2	2	2	2	2	2	2	2	2	3	2	1	2	2	2	41	1	1	2	2	1	1	1	2
106	1	72	2	1	1	3	2	4	1	2	1	1	2	3	2	1	3	2	2	13	2	3	3	3	2	2	2	2	2	2	2	3	2	3	2	2	2	3	2	2	46	1	1	1	1	1	1	1	1
112	2	73	2	1	2	4	2	3	2	2	1	1	3	3	2	2	4	2	2	15	1	2	2	2	1	1	2	2	1	1	2	2	2	2	3	2	2	1	1	1	33	1	1	3	2	2	1	2	3
124	2	75	2	1	1	3	2	5	2	1	1	1	2	3	2	2	3	2	1	13	1	2	2	1	1	2	3	3	1	1	1	3	3	3	1	2	1	1	1	1	34	1	1	2	2	1	1	1	1
128	2	76	2	1	1	3	2	4	2	2	1	1	4	3	2	2	3	2	2	14	2	2	2	2	2	2	1	2	2	1	2	1	2	2	1	2	3	2	1	1	35	1	1	2	1	1	1	1	1
137	1	79	2	1	1	3	2	3	2	2	1	2	3	3	3	2	3	2	2	15	1	2	2	2	2	2	2	2	2	2	2	2	2	2	2	2	2	2	2	2	39	1	1	3	2	2	1	2	3
139	2	80	2	1	1	3	2	5	2	2	1	2	2	3	2	2	3	2	2	14	2	3	2	2	2	2	1	2	1	2	2	2	2	2	2	2	3	2	2	2	40	1	1	2	1	1	1	1	1
8	2	62	2	1	2	4	2	3	1	1	1	1	1	3	4	3	3	4	4	21	1	2	1	1	1	2	1	2	1	1	2	1	1	1	1	1	2	2	1	1	26	1	1	1	1	1	1	1	1
22	2	64	2	1	2	4	2	3	1	2	1	2	2	3	3	3	1	1	0	11	2	2	2	2	3	2	2	2	2	2	2	2	2	2	3	2	1	2	2	2	41	1	1	2	2	1	1	1	2
41	1	65	1	1	2	4	2	6	1	1	1	1	3	5	4	2	4	3	1	19	1	3	2	1	1	1	2	2	1	1	1	1	1	3	3	3	3	3	2	1	36	1	2	1	1	1	1	1	1
52	1	67	2	1	2	4	2	3	1	1	1	2	2	3	3	3	2	2	0	13	2	2	2	3	2	2	2	3	2	2	2	2	2	2	2	2	1	3	2	1	41	1	2	2	2	1	1	1	2
53	1	67	2	1	2	4	2	3	1	1	1	2	2	3	3	3	3	2	0	14	2	2	2	2	3	2	2	2	2	2	2	2	2	2	3	2	1	2	2	2	41	1	1	2	2	1	1	1	2
66	1	68	1	1	2	4	2	5	1	1	1	1	3	4	3	1	5	3	2	18	4	1	1	1	4	4	1	1	4	4	1	1	1	1	1	1	2	2	1	1	37	1	1	1	1	1	1	1	1
19	1	63	1	2	1	1	2	4	2	1	1	1	2	2	0	0	5	4	2	13	1	3	4	3	1	1	1	1	1	1	2	1	3	2	1	3	1	4	1	3	38	1	1	1	1	1	1	1	1
45	2	66	1	2	2	4	2	4	1	1	1	1	2	5	4	3	4	3	1	20	4	1	1	1	4	4	1	1	4	4	1	1	1	2	3	1	3	3	2	2	44	3	4	1	1	1	1	2	2
79	1	70	2	2	2	2	2	3	1	1	1	1	2	3	3	2	3	4	2	17	1	1	2	3	1	1	2	3	2	2	2	2	3	2	2	2	2	3	3	1	40	1	2	2	2	1	1	1	2
98	1	71	2	2	2	4	2	3	1	1	1	2	2	3	3	3	3	2	0	14	2	2	1	2	3	2	2	2	2	2	2	2	2	2	2	2	1	2	2	2	39	1	1	2	2	1	1	1	2
100	2	71	1	2	2	2	2	5	1	1	1	2	4	5	4	0	0	3	3	15	1	1	1	4	1	1	1	1	1	1	1	1	2	1	4	2	1	1	1	1	28	1	1	1	1	1	1	1	1
104	2	72	2	2	2	2	2	2	2	1	1	1	2	4	3	1	5	4	3	20	1	4	1	1	1	1	1	4	1	1	1	1	1	1	1	1	2	1	1	1	27	1	1	1	1	1	1	1	1
140	1	80	2	2	2	2	2	5	2	1	1	2	2	2	2	3	2	3	2	14	2	4	1	1	1	2	3	2	2	1	1	3	3	3	2	2	2	3	2	1	41	2	3	2	2	1	1	1	2
4	1	60	1	2	2	4	2	6	1	1	1	1	2	3	3	3	3	4	3	19	1	1	1	1	1	1	1	1	1	1	4	4	4	4	1	1	4	1	1	1	35	1	1	1	1	1	1	1	1
70	2	69	2	2	2	4	2	2	1	1	1	1	3	4	4	4	4	4	4	24	1	1	1	1	1	1	1	1	1	1	1	1	1	1	1	2	1	1	1	1	21	1	1	1	1	1	1	1	1
129	1	77	2	2	2	4	2	3	1	1	1	1	2	3	4	0	3	3	0	13	1	2	2	3	2	2	3	3	3	2	1	3	3	3	2	3	1	4	1	2	46	1	1	3	4	1	1	1	4
35	1	65	1	1	2	2	2	4	2	2	2	1	1	3	3	3	3	3	3	18	1	1	1	1	1	1	1	1	1	1	1	1	1	1	1	1	1	1	1	1	20	1	1	1	1	1	1	1	1
86	1	70	2	1	1	3	2	4	2	2	2	1	2	3	2	2	2	3	2	14	2	3	2	3	3	2	2	2	2	2	3	3	2	2	2	2	2	2	2	2	45	1	1	2	2	1	1	1	1
83	1	70	2	1	2	2	2	4	2	2	2	1	2	3	4	3	3	2	2	17	3	2	1	1	4	3	2	2	2	2	2	1	2	2	3	3	2	2	3	3	45	1	2	2	2	1	1	1	2
[truncated: 29 more columns]
